# Supplementary material for: DNA-PK deficiency potentiates cGAS-mediated antiviral innate immunity
Source: PubMed Central journal article supplement (PMC7712783; doi:10.1038/s41467-020-19941-0), 2020-12-03
Supplement: 41467_2020_19941_MOESM1_ESM.pdf [file 41467_2020_19941_MOESM1_ESM.pdf]

**Supplementary information**

DNA-PK deficiency potentiates cGAS-mediated antiviral innate immunity  
Sun et al.

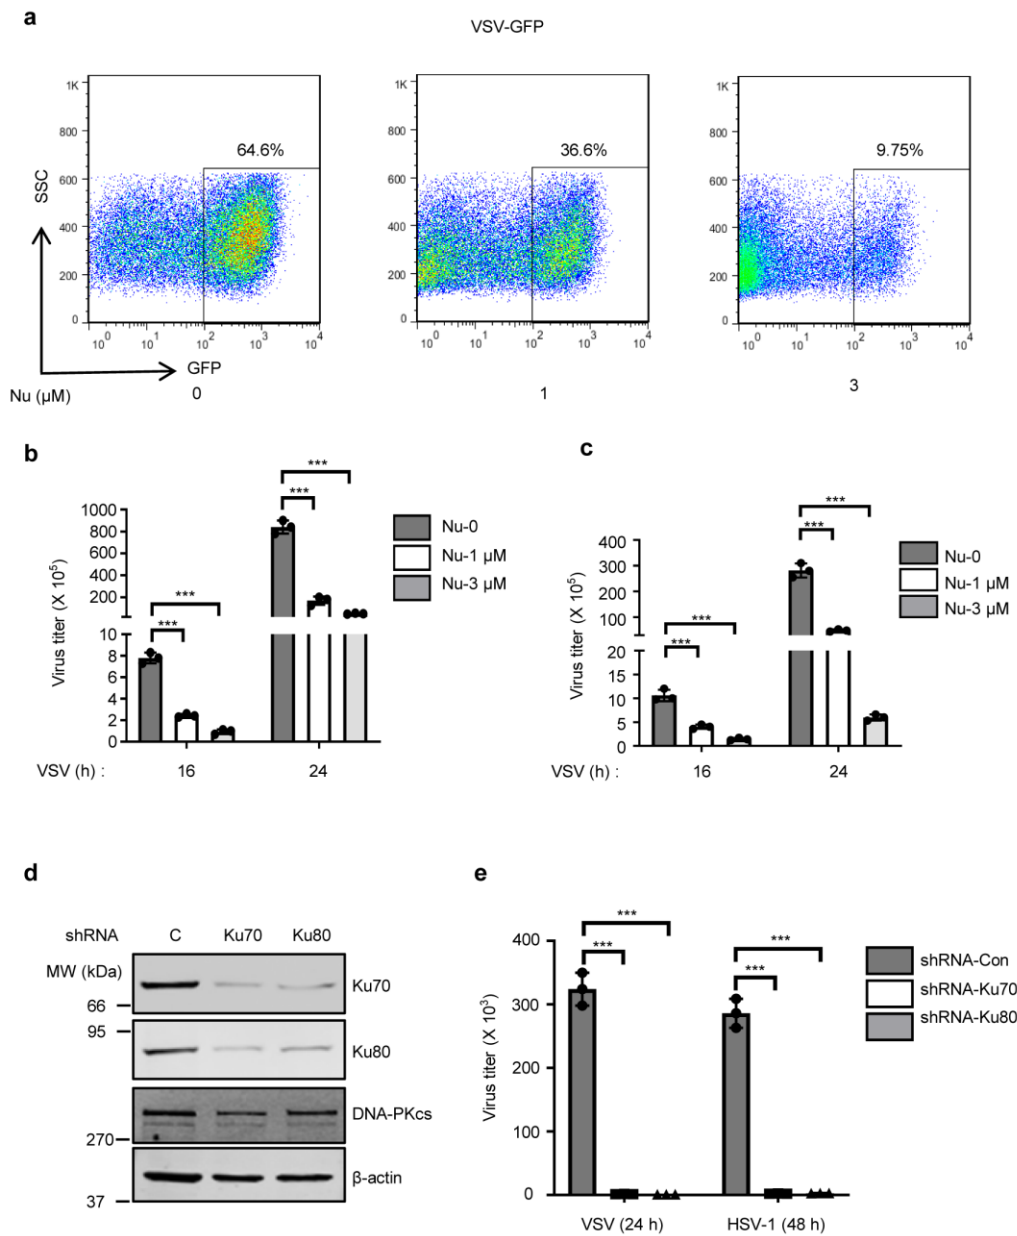

**Supplementary Fig. 1. DNA-PK inhibition suppresses VSV and HSV-1 replication.**

**a**, THP-1 cells were treated with Nu7441 and infected with VSV-GFP (MOI=0.01). GFP-positive cell percentage was quantified by Flow Cytometry at 16 h post-infection.

**b-c**, THP-1 or L929 cells were treated with Nu7441 and infected with VSV (MOI=0.01). Viral titer in the medium at the indicated time points was determined by plaque assay. **b**. VSV (16h):  $p=6 \times 10^{-5}$  (Nu-1  $\mu\text{M}$ ),  $p=3 \times 10^{-5}$  (Nu-3  $\mu\text{M}$ ); VSV (24h):  $p=8 \times 10^{-5}$  (Nu-1  $\mu\text{M}$ ),  $p=2 \times 10^{-5}$  (Nu-3  $\mu\text{M}$ ). **c**. VSV (16h):  $p=0.0009$  (Nu-1  $\mu\text{M}$ ),  $p=0.0002$  (Nu-3  $\mu\text{M}$ ); VSV (24h):  $p=0.0001$  (Nu-1  $\mu\text{M}$ ),  $p=6 \times 10^{-5}$  (Nu-3  $\mu\text{M}$ ).

**d**, THP-1 cells infected with control (C), Ku70 or Ku80 shRNA lentivirus were selected with puromycin, and whole-cell lysates (WCLs) were analyzed by immunoblotting with the indicated antibodies.

**e**, THP-1 stable cells as described in (d) were infected with VSV or HSV-1 (MOI=0.01). Viral titer in the medium at the indicated time points were determined by plaque assays. VSV (24h):  $p=3 \times 10^{-5}$  (Ku70),  $p=3 \times 10^{-5}$  (Ku80); HSV-1 (48h):  $p=3 \times 10^{-5}$  (Nu-1  $\mu$ M),  $p=3 \times 10^{-5}$  (Nu-3  $\mu$ M). All experiments were done at least twice, and one representative is shown.  $n=3$  biologically independent samples for **b**, **c**, **e**. Data are presented as mean values  $\pm$  SD. \*\*\* $p < 0.005$ , two-tailed Student's t-test. Source data are provided as a Source Data file.

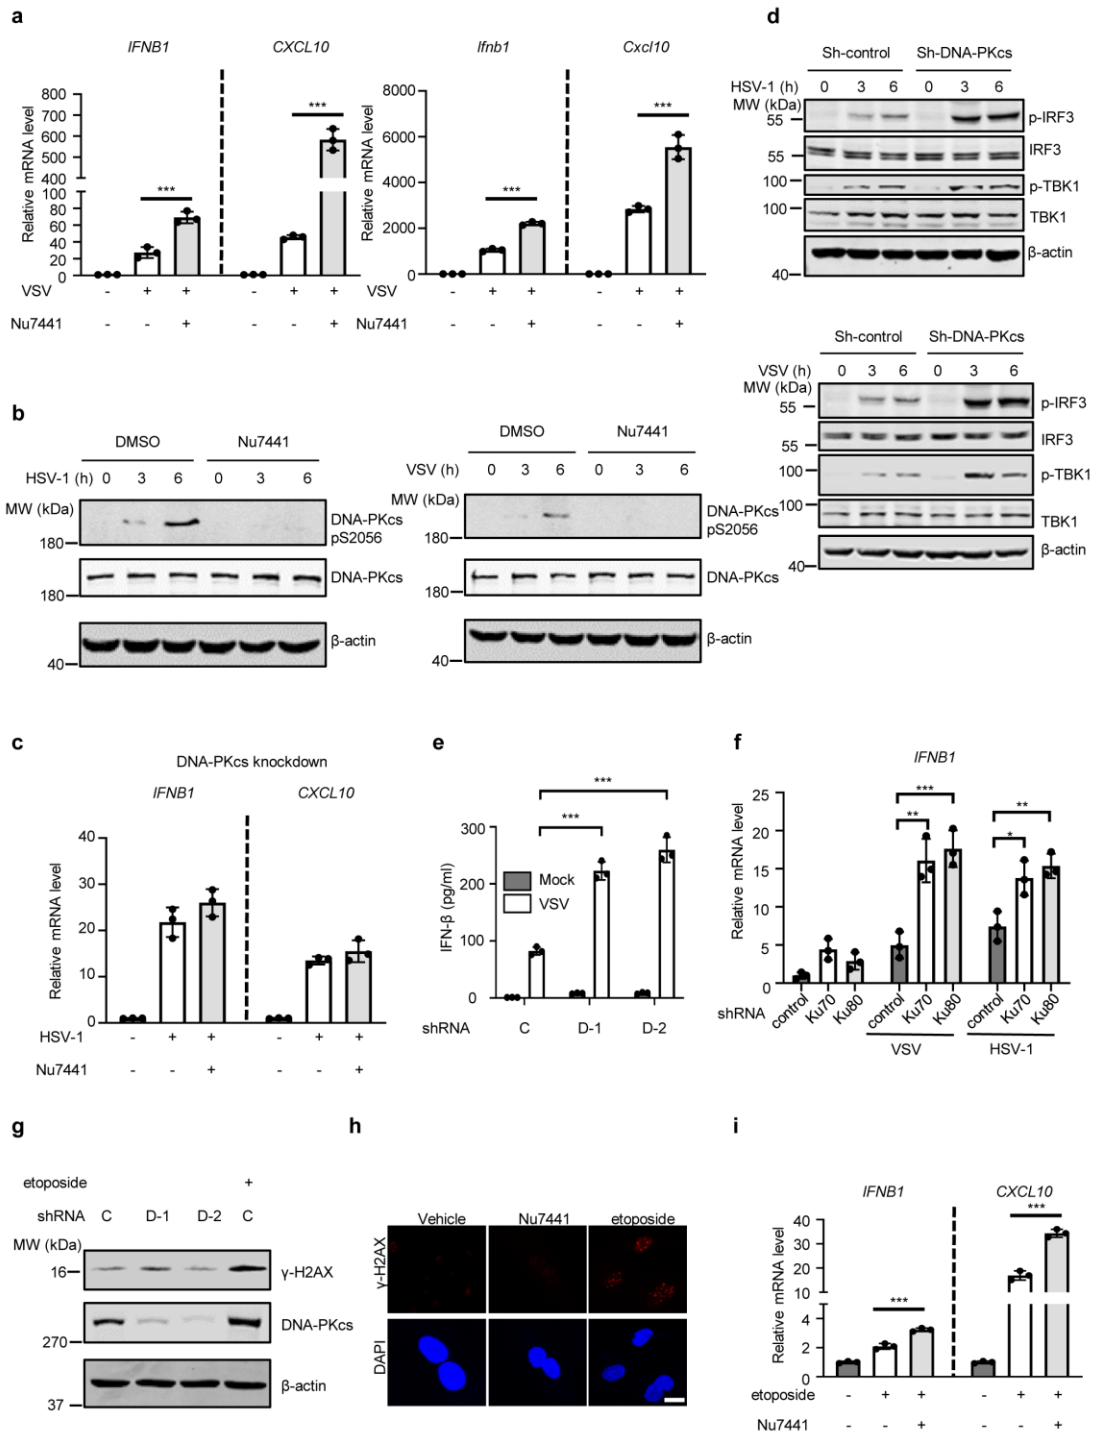

**Supplementary Fig. 2.** DNA-PK deficiency potentiates stronger innate immune responses.

- a,** THP-1 or L929 cells were treated with Nu7441 (3  $\mu$ M) and infected with VSV (MOI=5). Infected cells were harvested at 6 hpi, and the expression of indicated cytokine genes was analyzed by real-time PCR. *IFNB1*:  $p=0.0016$ , *CXCL10*:  $p=5 \times 10^{-5}$  (left panel); *Ifnb1*:  $p=3 \times 10^{-5}$ , *Cxcl10*:  $p=0.0010$  (right panel).
- b,** THP-1 cells were mock-treated or treated with Nu7441 (3  $\mu$ M) and infected with HSV-1 or VSV (MOI=5). Cells were harvested at the indicated time points and whole cell lysates (WCLs) were analyzed by immunoblotting with the indicated antibodies.
- c,** THP-1 cells stably expressing DNA-PKcs shRNA were infected with HSV-1 (MOI=5) and treated with Nu7441 (3  $\mu$ M). Cells were harvested at 6 hpi, and the expression of indicated cytokine genes was analyzed by real-time PCR.
- d,** THP-1 cells stably expressing control or DNA-PKcs shRNA were infected with HSV-1 or VSV (MOI=5). Cells were harvested at the indicated time points and WCLs were analyzed by immunoblotting with the indicated antibodies.
- e,** THP-1 cells stably expressing control or DNA-PKcs shRNA were infected with VSV (MOI=0.05). Infected cells were harvested at 16 hpi, and IFN- $\beta$  was determined by ELISA.  $p=0.0002$  (D-1),  $p=0.0002$  (D-2).
- f,** THP-1 cells stably expressing control, Ku70 or Ku80 shRNA were infected with VSV (MOI=5). Infected cells were harvested at 6 hpi, and the expression of *IFNB1* was determined by real-time PCR. VSV:  $p=0.0054$  (Ku70),  $p=0.0018$  (Ku80); HSV-1:  $p=0.021$  (Ku70),  $p=0.0055$  (Ku80).
- g,** THP-1 cells stably expressing control or DNA-PKcs shRNA were mock-treated or treated with etoposide (10  $\mu$ M) for 2 h. WCLs were analyzed by immunoblotting with the indicated antibodies.
- h,** THP-1 cells mock-treated or treated with Nu7441 (3  $\mu$ M) for 6 h or etoposide (10  $\mu$ M) for 2 h.  $\gamma$ -H2AX were detected by immunofluorescence. (Scale bar = 10  $\mu$ m).
- i,** THP-1 cell were treated with Nu7441 (3  $\mu$ M) and etoposide (10  $\mu$ M) for 8 h, and the expression of *IFNB1* was determined by real-time PCR. *IFNB1*:  $p=0.0009$ , *CXCL10*:  $p=0.0003$ .

All experiments were done at least twice, and one representative is shown.  $n=3$  biologically independent samples for **a, c, e, f, i**. Data are presented as mean values  $\pm$  SD. \* $p<0.05$ , \*\* $p<0.01$ , \*\*\* $p<0.005$ , two-tailed Student's t-test. Source data are provided as a Source Data file.

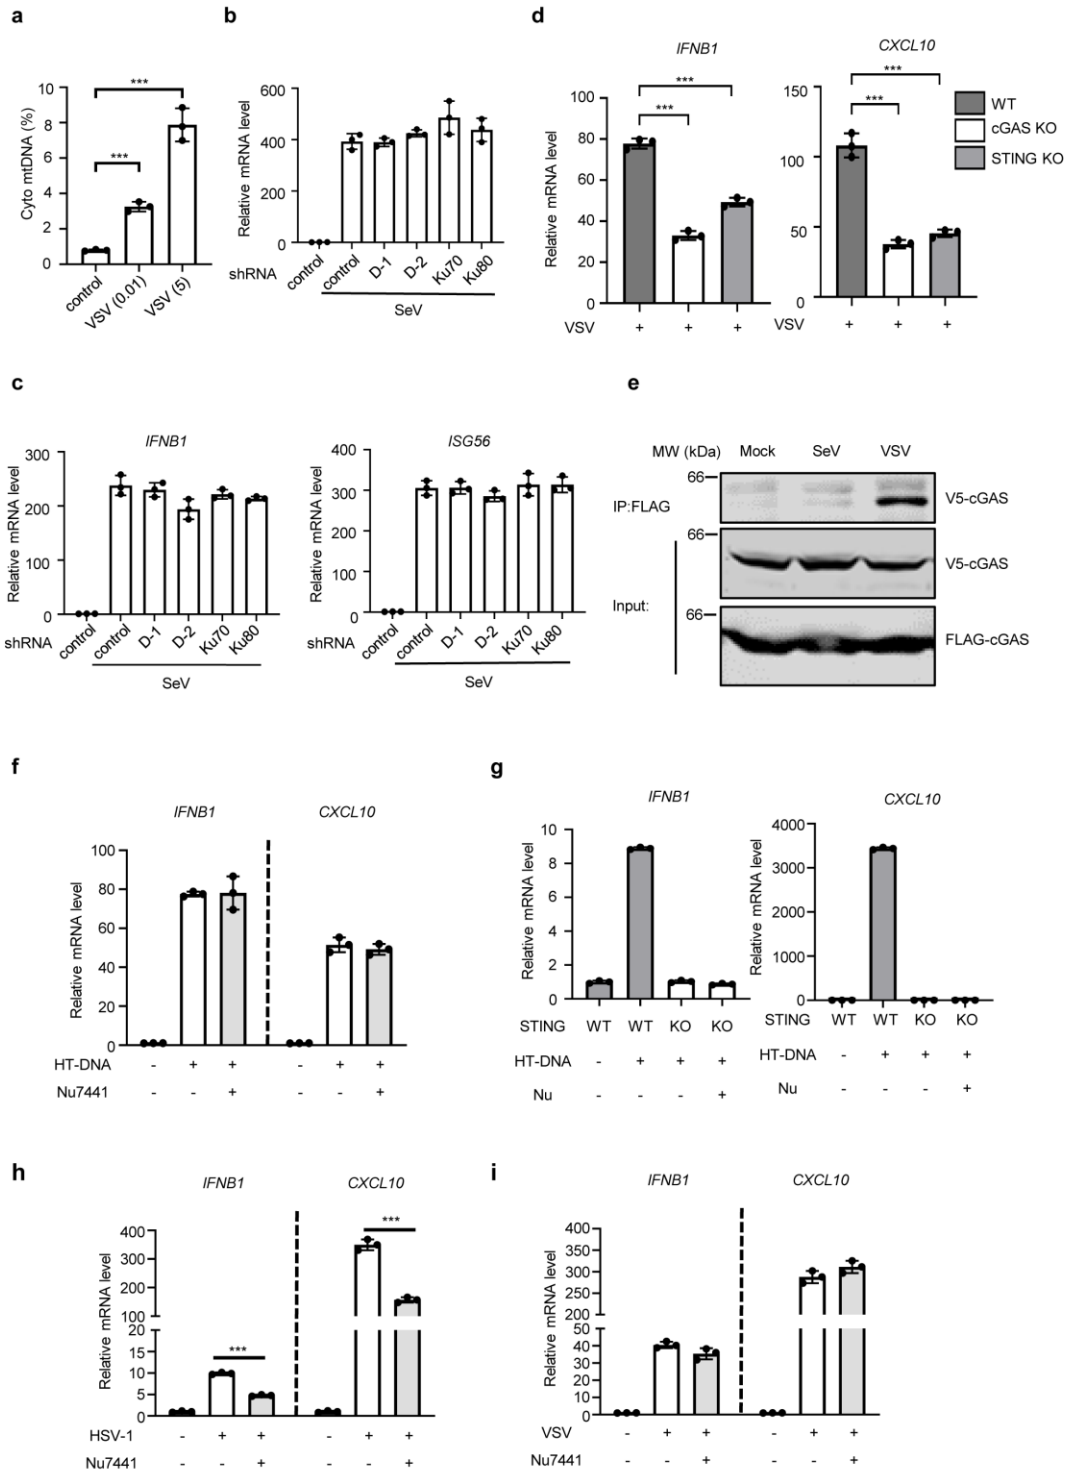

**Supplementary Fig. 3. DNA-PK inhibition enhances cGAS-mediated antiviral immune responses.**

**a**, THP-1 cells were infected with VSV (MOI=0.01 or 5). Cytoplasmic mitochondrial DNA was extracted and quantified by real-time PCR at 6 hpi.  $p=0.0031$  (VSV-0.01);  $p=0.0002$  (VSV-5).

**b-c**, THP-1 cells stably expressing control, DNA-PKcs, Ku70 or Ku80 shRNA were infected with SeV (20 HAU/ml). Infected cells were harvested at 6 hpi, and the expression of viral and indicated cytokine genes was analyzed by real-time PCR.

- d,** THP-1 cells as described in Fig. 3a were infected with VSV (MOI=5). Infected cells were harvested at 6 hpi, and the expression of viral and indicated cytokine genes was analyzed by real-time PCR. *IFNB1*:  $p=2 \times 10^{-5}$  (cGAS KO),  $p=0.0001$  (STING KO); *CXCL10*:  $p=0.0002$  (cGAS KO),  $p=0.0003$  (STING KO).
- e,** 293T cells stably expressing FLAG-cGAS and V5-cGAS were mock-infected or infected with SeV (20 HAU/ml) or VSV (MOI=0.01) for 16 h. WCLs were precipitated with anti-FLAG agarose. Precipitated proteins and WCLs were analyzed by immunoblotting with the indicated antibodies.
- f,** THP-1 cells stably expressing DNA-PKcs shRNA were transfected with HT-DNA (1  $\mu$ g/ml) and treated with Nu7441 (3  $\mu$ M) for 6 h. The expression of indicated cytokine genes was analyzed by real-time PCR.
- g,** THP-1 or THP-1 STING KO cells were transfected with HT-DNA (1  $\mu$ g/ml) for 6 h, and the expression of indicated cytokine genes was analyzed by real-time PCR.
- h-i,** THP-1 STING KO cells were infected with HSV-1 or VSV (MOI=5) and treated with Nu7441 (3  $\mu$ M). Infected cells were harvested at 6 hpi, and the expression of indicated cytokine genes was analyzed by real-time PCR. **h.** *IFNB1*:  $p=7 \times 10^{-6}$ , *CXCL10*:  $p=0.0001$ .

All experiments were done at least twice, and one representative is shown.  $n=3$  biologically independent samples for **a-d, f-i**. Data are presented as mean values  $\pm$  SD. \*\*\* $p < 0.005$ , two-tailed Student's t-test. Source data are provided as a Source Data file.

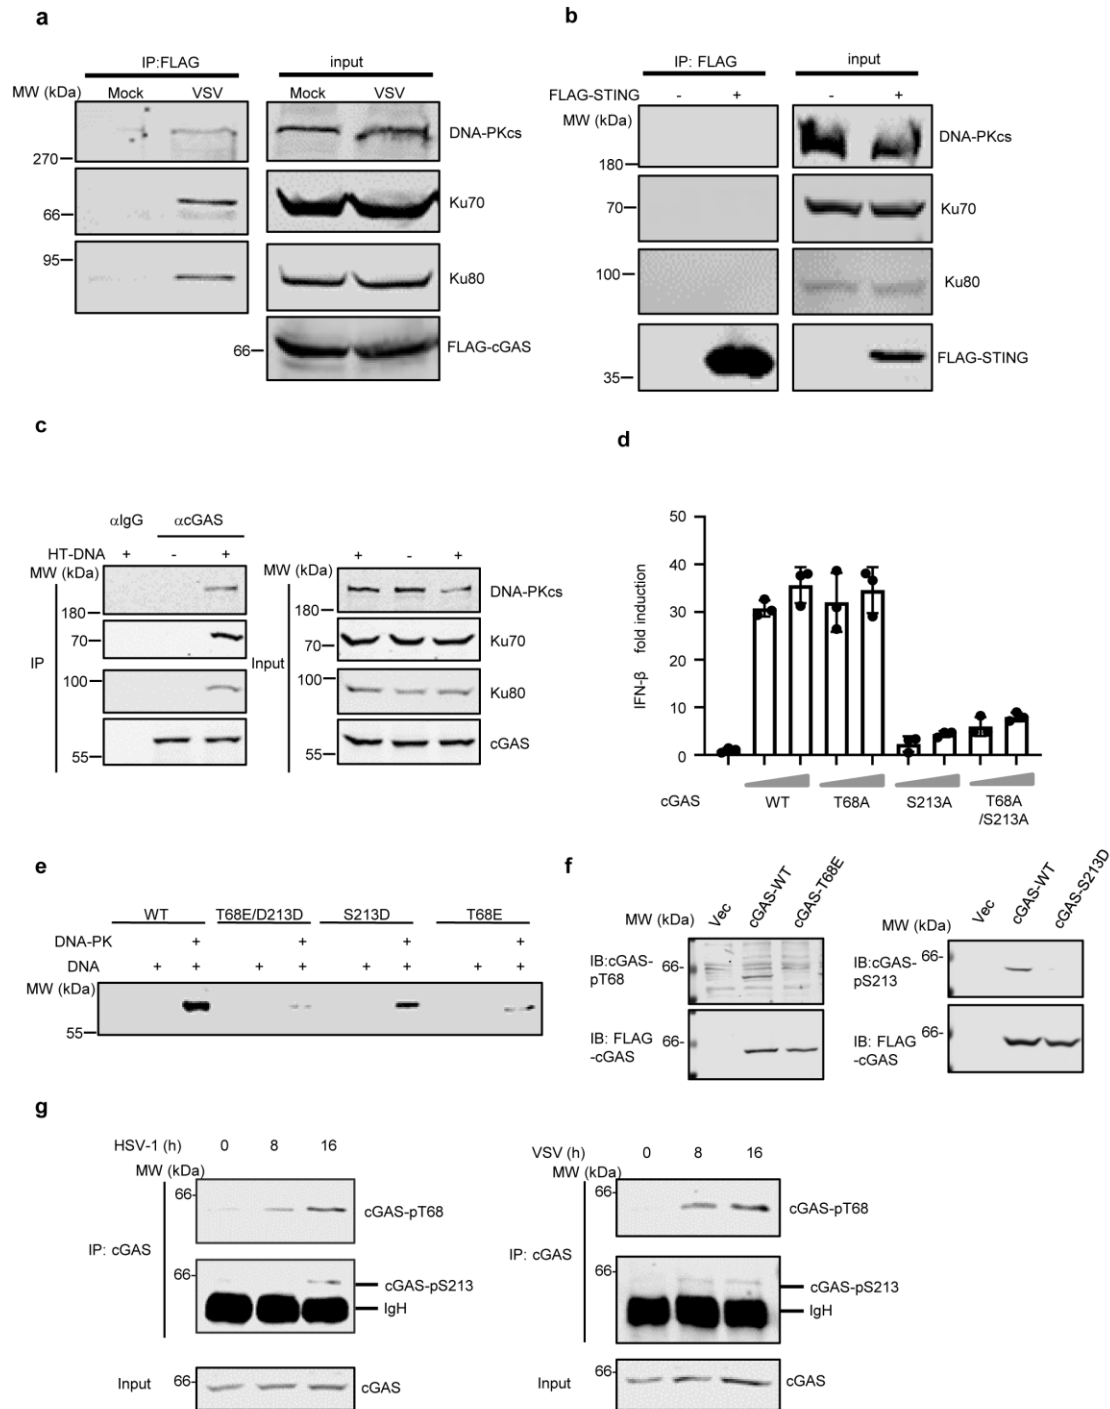

**Supplementary Fig. 4. DNA-PK phosphorylates cGAS.**

- a**, THP-1 cells stably expressing FLAG-cGAS were mock-infected or infected with VSV (MOI=0.01) for 16 h. WCLs were precipitated with anti-FLAG agarose. Precipitated proteins and WCLs were analyzed by immunoblotting with the indicated antibodies.
- b**, THP-1 cells stably expressing vector or FLAG-STING were infected with VSV (MOI=0.01) for 16 h. WCLs were precipitated with anti-FLAG agarose. Precipitated proteins and WCLs were analyzed by immunoblotting with the indicated antibodies.
- c**, THP-1 cells were transfected with HT-DNA (1  $\mu$ g/ml) for 6 h before co-immunoprecipitation

and immunoblotting analysis.

- d**, 293T cells were transfected with an IFN- $\beta$  reporter plasmid cocktail with plasmids containing cGAS WT or the mutants and STING. IFN- $\beta$  activation was determined by luciferase assay.
- e**, *In vitro* kinase assay was performed using DNA-PK complex and purified cGAS or the mutants with HT-DNA (1  $\mu$ g/ml).
- f**, 293T cells were transfected with cGAS WT or the mutants and WCLs were analyzed by immunoblotting with the indicated antibodies.
- g**, THP-1 cells were mock-infected or infected with HSV-1 (MOI=1) or VSV (MOI=0.1) for 8 h and 16 h before co-immunoprecipitation and immunoblotting analysis.

All experiments were done at least twice, and one representative is shown. n=3 biologically independent samples for **d**. Data are presented as mean values  $\pm$  SD. Source data are provided as a Source Data file.

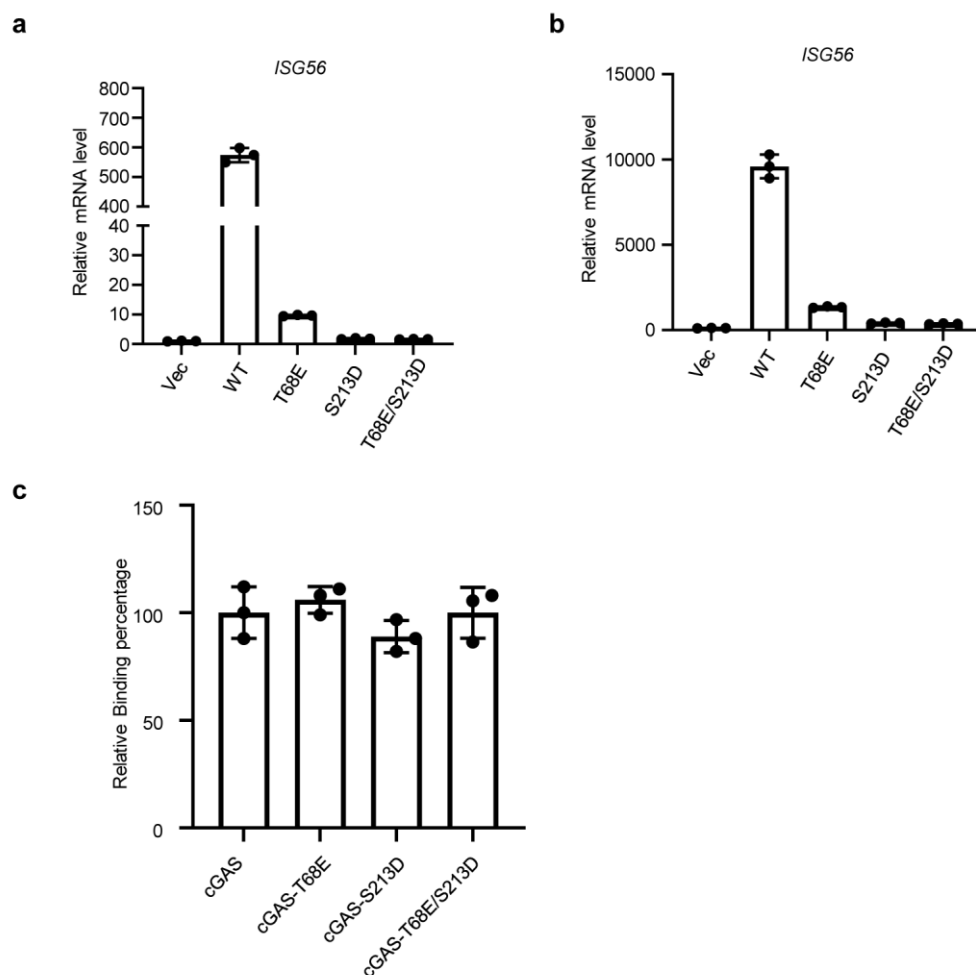

**Supplementary Fig. 5.** cGAS phosphorylation by DNA-PK inhibits the activity of cGAS.

- a**, The expression of *Isg56* in reconstituted cGAS stable cells was analyzed by real-time PCR.
- b**, Reconstituted cGAS stable cells were stimulated with HT-DNA (1  $\mu$ g/mL). Cells were harvested at 6 h post transfection, and the expression of *Isg56* was analyzed by real-time PCR.



**c**, WCLs were prepared from 293T cells transiently transfecting cGAS WT or the mutants. Biotinylated interferon-stimulating DNA (Biotin-ISD) was used to pull down cGAS WT or the mutants *in vitro*, and precipitated proteins were analyzed by immunoblotting and binding percentage was quantified.

All experiments were done at least twice, and one representative is shown. n=3 biologically independent samples for **a-c**. Data are presented as mean values +/- SD. Source data are provided as a Source Data file.

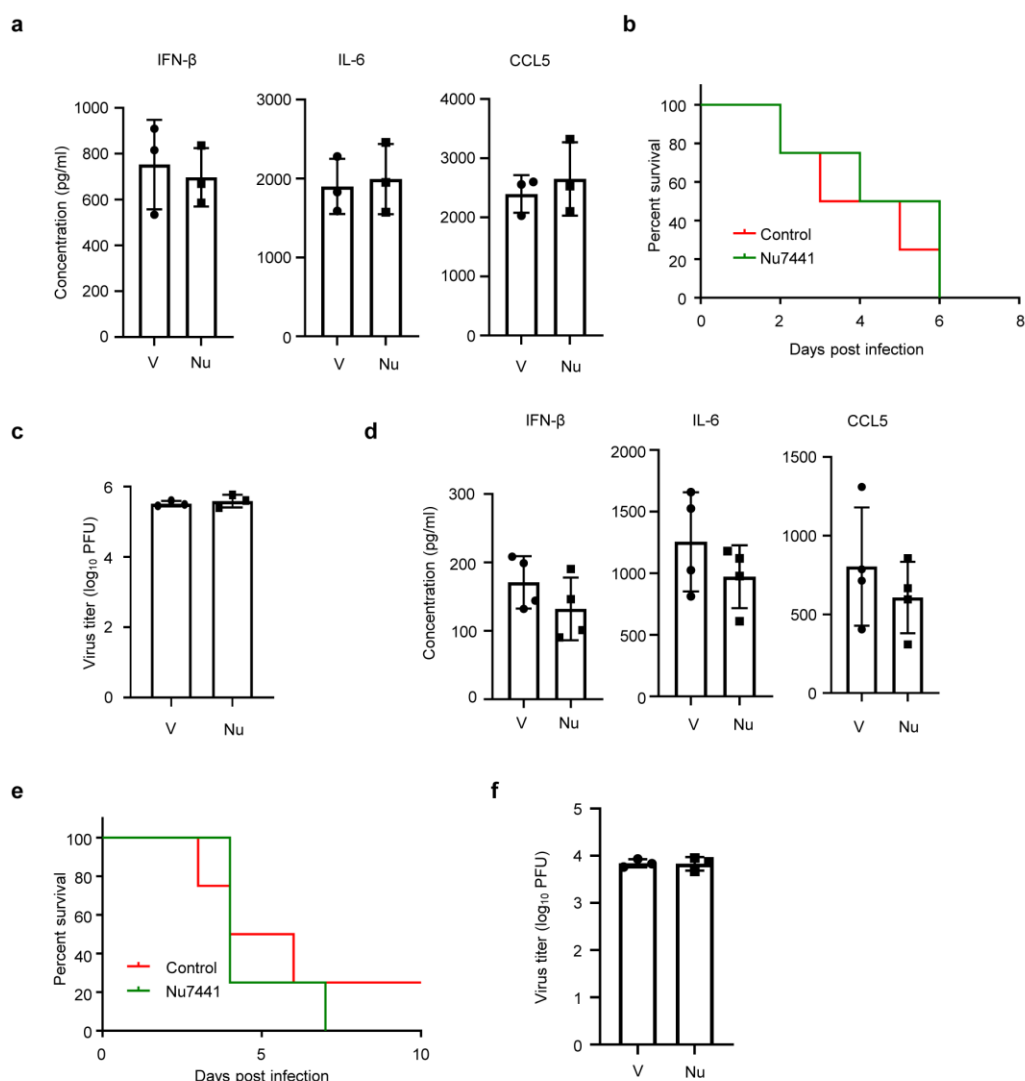

**Supplementary Fig. 6. Nu7441 treatment promotes antiviral innate immunity and suppresses VSV and HSV-1 replication *in vivo*.**

**a-c**, Age- and gender-matched cGAS KO mice were treated with 20mg/kg Nu7441 or control through intraperitoneal injection and infected with VSV ( $10^8$  PFU). (a) Blood was collected at 6 h post-infection, and indicated cytokines in sera were determined by ELISA (n=3 biologically independent animals). (b) Mouse survival was recorded and shown as percentage over time (n=4 biologically independent animals). (c) Mice were sacrificed at 3

days post-infection, and viral titers in the spleens were quantified by plaque assays (n=3 biologically independent animals).

**d-f**, Age- and gender-matched cGAS KO mice were treated with 20mg/kg Nu7441 or control through intraperitoneal injection and infected with HSV-1 ( $5 \times 10^7$  PFU). (d) Blood was collected at 6 h post-infection, and indicated cytokines in sera were determined by ELISA (n=4 biologically independent animals). (e) Mouse survival was recorded and shown as percentage over time (n=4 biologically independent animals). (f) Mice were sacrificed at 3 days post-infection, and viral titers in the brains were quantified by plaque assays (n=3 biologically independent animals).

All experiments were done at least twice, and one representative is shown. For **a, c, d, f**, data are presented as mean values  $\pm$  SD. Two-tailed Student's t-test (a, c, d, f) and log-rank test (b, e).

Source data are provided as a Source Data file.

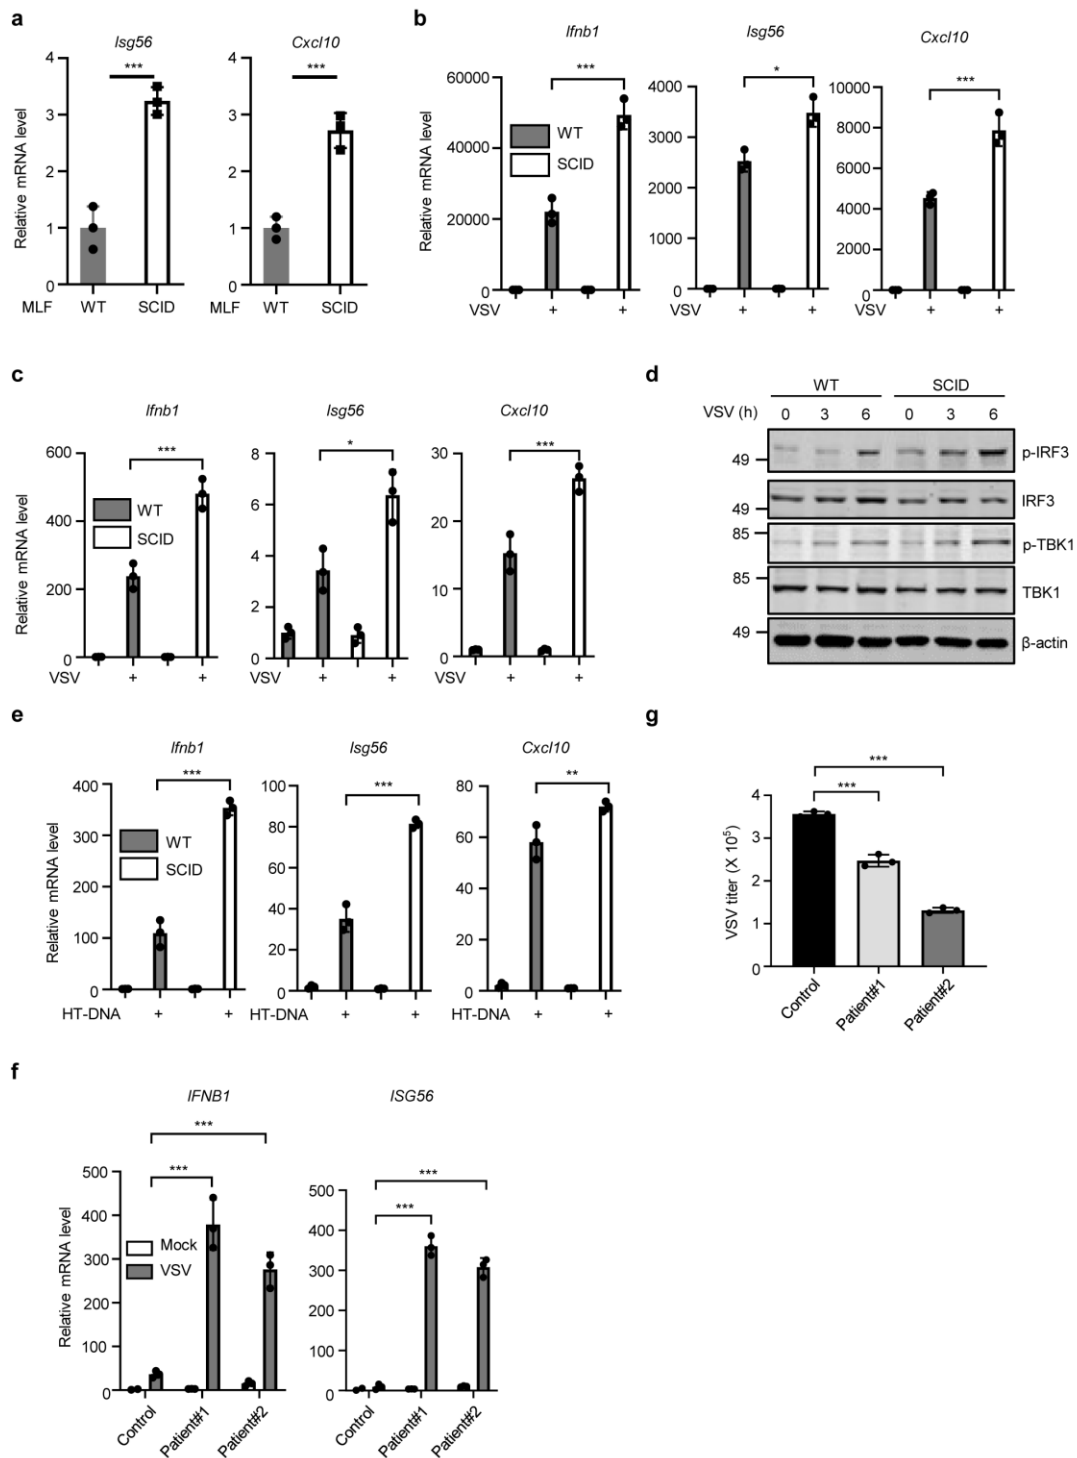

**Supplementary Fig. 7.** DNA-PK deficiency potentiates antiviral innate immunity in cells isolated from mice and patients.

**a**, RNA was extracted from MLFs generated from WT or SCID mice and the expression of the indicated genes was analyzed by real-time PCR.  $p=0.0010$  (*Isg56*);  $p=0.0012$  (*Cxcl10*).

**b**, MLFs were infected with VSV (MOI=5). Cells were harvested at 6 h post-infection, and the expression of the indicated genes was analyzed by real-time PCR.  $p=0.0009$  (*Ifnb1*);  $p=0.028$  (*Isg56*);  $p=0.0023$  (*Cxcl10*).

- c**, Bone marrow-derived macrophages (BMDMs) were infected with VSV (MOI=5). Total RNA was extracted at 6 h post-infection and the expression of the indicated genes was determined by real-time PCR.  $p=0.0019$  (*Ifnb1*);  $p=0.016$  (*Isg56*);  $p=0.0046$  (*Cxcl10*).
- d**, MLFs generated from WT or SCID mice were infected with VSV (MOI=5). Cells were harvested at the indicated time points, and WCLs were analyzed by immunoblotting with the indicated antibodies.
- e**, BMDMs generated from WT or SCID mice were transfected with HT-DNA (1  $\mu\text{g}/\text{mL}$ ). Cells were harvested at 6 h post-transfection, and the expression of the indicated genes was analyzed by real-time PCR.  $p=0.0001$  (*Ifnb1*);  $p=0.0003$  (*Isg56*);  $p=0.026$  (*Cxcl10*).
- f**, Fibroblasts generated from control subject or patients with DNA-PKcs mutations were infected with VSV (MOI=5). Cells were harvested at 6 h post-transfection, and the expression of the indicated genes was analyzed by real-time PCR. *IFNB1*:  $p=0.0005$  (patient#1),  $p=0.0005$  (patient#2); *ISG56*:  $p=2 \times 10^{-5}$  (patient#1),  $p=3 \times 10^{-5}$  (patient#2);
- g**, Fibroblasts generated from control subject or patients with DNA-PKcs mutations were infected with VSV (MOI=0.05). Viral titer in the medium was determined by plaque assays at 24 h post-infection.  $p=0.0002$  (patient#1),  $p=2 \times 10^{-5}$  (patient#2).

All experiments were done at least twice, and one representative is shown.  $n=3$  biologically independent samples for **a-c**, **e-g**. Data are presented as mean values  $\pm$  SD. \* $p<0.05$ , \*\* $p<0.01$ , \*\*\* $p<0.005$ , two-tailed Student's t-test. Source data are provided as a Source Data file.

Supplementary Table

| Q-PCR primers for human genes:                  |                         |                        |
|-------------------------------------------------|-------------------------|------------------------|
| <i>IFNB1</i>                                    | CAGGAGAGCAATTTGGAGGA    | CTTTCGAAGCCTTTGCTCTG   |
| <i>ISG56</i>                                    | TCTCAGAGGAGCCTGGCTAA    | TGACATCTCAATTGCTCCAG   |
| <i>CXCL10</i>                                   | CACCATGAATCAAACCTGCGA   | GCTGATGCAGGTACAGCGT    |
| <i>ACTB</i><br>( $\beta$ -actin)                | GTTGTCGACGACGAGCG       | GCACAGAGCCTCGCCTT      |
| Q-PCR primers for mouse genes:                  |                         |                        |
| <i>Ifnb1</i>                                    | CCCTATGGAGATGACGGAGA    | CCCAGTGCTGGAGAAATTGT   |
| <i>Isg56</i>                                    | CAAGGCAGGTTTCTGAGGAG    | GACCTGGTCACCATCAGCAT   |
| <i>Cxcl10</i>                                   | CTCATCCTGCTGGGTCTGAG    | CCTATGGCCCTCATTCTCAC   |
| <i>Actb</i><br>( $\beta$ -actin)                | TCTACGAGGGCTATGCTCTCC   | TCTTTGATGTCACGCACGATTC |
| Primers for quantification of mitochondrial DNA |                         |                        |
| EGFP                                            | ACGGCGACGTAAACGGCCAC    | GCACGCCGTAGGTCAGGGTG   |
| mtDNA1                                          | CACCCAAGAACAGGGTTTGT    | TGGCCATGGGTATGTTGTAA   |
| mtDNA2                                          | CTATCACCCCTATTAACCACTCA | TTCGCCTGTAATATTGAACGTA |
